# Supplementary material for: Serum circular RNAs act as blood-based biomarkers for hypertrophic obstructive cardiomyopathy
Source: PubMed Central journal article supplement (PMC6937321; doi:10.1038/s41598-019-56617-2), 2019-12-30
Supplement: 41598_2019_56617_MOESM1_ESM.pdf [file 41598_2019_56617_MOESM1_ESM.pdf]

## SUPPLEMENTARY INFORMATION

### **Serum circular RNAs act as blood-based biomarkers for hypertrophic obstructive cardiomyopathy**

Kristina Sonnenschein, MD<sup>1,2</sup> \*, Adriana Luisa Wilczek<sup>1</sup> \*, David de Gonzalo-Calvo, PhD<sup>1,3,4,5</sup>  
Angelika Pfanne<sup>1</sup>, Carolin Zwadlo<sup>2</sup>, Udo Bavendiek<sup>2</sup>, Johann Bauersachs, MD<sup>2,7</sup>, Jan Fiedler,  
PhD<sup>1\*</sup>, Thomas Thum, MD, PhD<sup>1,6,7\*</sup>

<sup>1</sup> Institute of Molecular and Translational Therapeutic Strategies (IMTTS), Hannover Medical School, Hannover, Germany

<sup>2</sup> Department of Cardiology and Angiology, Hannover Medical School, Hannover, Germany

<sup>3</sup> Institute of Biomedical Research of Barcelona (IIBB) - Spanish National Research Council (CSIC), 08036, Barcelona, Spain.

<sup>4</sup> CIBERCV, Institute of Health Carlos III, 28029, Madrid, Spain.

<sup>5</sup> Biomedical Research Institute Sant Pau (IIB Sant Pau), 08025, Barcelona, Spain.

<sup>6</sup> National Heart and Lung Institute, Imperial College London, London, UK

<sup>7</sup> Excellence Cluster REBIRTH, Hannover Medical School, Hannover, Germany

**Supplemental Table S1:** In silico analysis of circRNA isoforms.

| position (genome browser link) | strand | circRNA ID       | genomic length | spliced length | best transcript   | gene symbol | circRNA study                                                       |
|--------------------------------|--------|------------------|----------------|----------------|-------------------|-------------|---------------------------------------------------------------------|
| chr1:65858293-65858516         | -      | hsa_circ_0113915 | 223            | 223            | NM_014787         | DNAJC6      | Rybak2015<br>Jeck2013,<br>Maass2017,<br>Rybak2015,<br>Salzman2013   |
| chr1:65830317-65831879         | +      | hsa_circ_0002454 | 1562           | 350            | NM_014787         | DNAJC6      | Rybak2015,<br>Salzman2013                                           |
| chr1:65830317-65860715         | +      | hsa_circ_0113910 | 30398          | 1845           | NM_014787         | DNAJC6      | Rybak2015                                                           |
| chr1:65830317-65864564         | +      | hsa_circ_0012885 | 34247          | 1914           | NM_014787         | DNAJC6      | Salzman2013                                                         |
| chr1:65871552-65874466         | +      | hsa_circ_0113916 | 2914           | 407            | NM_014787         | DNAJC6      | Rybak2015                                                           |
| chr1:65830317-65855310         | +      | hsa_circ_0012884 | 24993          | 1275           | NM_014787         | DNAJC6      | Salzman2013<br>Rybak2015,<br>Salzman2013                            |
| chr1:65830317-65845207         | +      | hsa_circ_0012883 | 14890          | 473            | NM_014787         | DNAJC6      | Salzman2013                                                         |
| chr1:65831730-65831879         | +      | hsa_circ_0012886 | 149            | 149            | NM_014787         | DNAJC6      | Salzman2013                                                         |
| chr1:65858293-65858394         | -      | hsa_circ_0113914 | 101            | 101            | NM_014787         | DNAJC6      | Rybak2015                                                           |
| chr1:65830317-65871816         | +      | hsa_circ_0113911 | 41499          | 2298           | NM_014787         | DNAJC6      | Rybak2015                                                           |
| chr1:65811293-65831879         | +      | hsa_circ_0113909 | 20586          | 463            | ENST00000263441.7 | DNAJC6      | Rybak2015                                                           |
| chr1:65849875-65855310         | +      | hsa_circ_0113912 | 5435           | 802            | NM_014787         | DNAJC6      | Rybak2015                                                           |
| chr1:65854018-65855310         | +      | hsa_circ_0113913 | 1292           | 355            | NM_014787         | DNAJC6      | Rybak2015                                                           |
| chr2:9083315-9122273           | -      | hsa_circ_0121179 | 38958          | 23726          | ENST00000305997.3 | MBOAT2      | Rybak2015                                                           |
| chr2:9000742-9008679           | -      | hsa_circ_0121168 | 7937           | 454            | ENST00000305997.3 | MBOAT2      | Rybak2015                                                           |
| chr2:9048750-9114564           | -      | hsa_circ_0121171 | 65814          | 16113          | ENST00000305997.3 | MBOAT2      | Rybak2015<br>Jeck2013,<br>Maass2017,<br>Rybak2015,<br>Salzman2013   |
| chr2:9028147-9098771           | -      | hsa_circ_0008847 | 70624          | 376            | NM_138799         | MBOAT2      | Salzman2013                                                         |
| chr2:9048750-9114564           | -      | hsa_circ_0141916 | 65814          | 16113          | ENST00000305997.3 | MBOAT2      | Maass2017                                                           |
| chr2:9079949-9099994           | -      | hsa_circ_0121175 | 20045          | 4813           | ENST00000305997.3 | MBOAT2      | Rybak2015                                                           |
| chr2:9083315-9083393           | -      | hsa_circ_0052511 | 78             | 78             | NM_138799         | MBOAT2      | Salzman2013<br>Jeck2013,<br>Maass2017,<br>Memczak2013,<br>Rybak2015 |
| chr2:9079949-9098771           | -      | hsa_circ_0000973 | 18822          | 3590           | NM_138799         | MBOAT2      | Rybak2015                                                           |
| chr2:9083315-9127890           | -      | hsa_circ_0141918 | 44575          | 29343          | ENST00000305997.3 | MBOAT2      | Maass2017                                                           |

|                      |   |                  |        |       |                   |        |                                                       |
|----------------------|---|------------------|--------|-------|-------------------|--------|-------------------------------------------------------|
| chr2:9000742-9008679 | - | hsa_circ_0141915 | 7937   | 454   | ENST00000305997.3 | MBOAT2 | Maass2017                                             |
| chr2:9083315-9102747 | - | hsa_circ_0121177 | 19432  | 4200  | ENST00000305997.3 | MBOAT2 | Rybak2015                                             |
| chr2:9017159-9048846 | - | hsa_circ_0052507 | 31687  | 391   | NM_138799         | MBOAT2 | Rybak2015,<br>Salzman2013                             |
| chr2:9048750-9127890 | - | hsa_circ_0121173 | 79140  | 29439 | ENST00000305997.3 | MBOAT2 | Rybak2015                                             |
| chr2:9048750-9048846 | - | hsa_circ_0052509 | 96     | 96    | NM_138799         | MBOAT2 | Salzman2013<br>Jeck2013,<br>Maass2017,<br>Rybak2015,  |
| chr2:9022640-9098771 | - | hsa_circ_0005079 | 76131  | 431   | NM_138799         | MBOAT2 | Salzman2013                                           |
| chr2:9017116-9098771 | - | hsa_circ_0121169 | 81655  | 658   | ENST00000305997.3 | MBOAT2 | Rybak2015                                             |
| chr2:9013237-9098771 | - | hsa_circ_0052506 | 85534  | 808   | NM_138799         | MBOAT2 | Rybak2015,<br>Salzman2013                             |
| chr2:9008575-9028203 | - | hsa_circ_0052504 | 19628  | 592   | NM_138799         | MBOAT2 | Salzman2013<br>Rybak2015,<br>Maass2017,<br>Rybak2015, |
| chr2:9017159-9098771 | - | hsa_circ_0052508 | 81612  | 615   | NM_138799         | MBOAT2 | Salzman2013                                           |
| chr2:8996700-9098771 | - | hsa_circ_0052501 | 102071 | 3596  | NM_138799         | MBOAT2 | Salzman2013                                           |
| chr2:9019778-9020143 | - | hsa_circ_0000971 | 365    | 365   | NM_138799         | MBOAT2 | Memczak2013                                           |
| chr2:9022640-9083393 | - | hsa_circ_0121170 | 60753  | 285   | ENST00000305997.3 | MBOAT2 | Rybak2015                                             |
| chr2:9083315-9114564 | - | hsa_circ_0141917 | 31249  | 16017 | ENST00000305997.3 | MBOAT2 | Maass2017<br>Jeck2013,<br>Maass2017,<br>Rybak2015,    |
| chr2:9083315-9098771 | - | hsa_circ_0007334 | 15456  | 224   | NM_138799         | MBOAT2 | Salzman2013                                           |
| chr2:9002400-9098771 | - | hsa_circ_0052503 | 96371  | 1429  | NM_138799         | MBOAT2 | Salzman2013                                           |
| chr2:9000742-9098771 | - | hsa_circ_0052502 | 98029  | 1262  | NM_138799         | MBOAT2 | Rybak2015,<br>Salzman2013                             |
| chr2:9083315-9127890 | - | hsa_circ_0121180 | 44575  | 29343 | ENST00000305997.3 | MBOAT2 | Rybak2015                                             |
| chr2:9079949-9083393 | - | hsa_circ_0121174 | 3444   | 3444  | ENST00000305997.3 | MBOAT2 | Rybak2015                                             |
| chr2:9048750-9122273 | - | hsa_circ_0121172 | 73523  | 23822 | ENST00000305997.3 | MBOAT2 | Rybak2015                                             |
| chr2:9083315-9143876 | - | hsa_circ_0052512 | 60561  | 432   | NM_138799         | MBOAT2 | Salzman2013                                           |
| chr2:9083315-9114564 | - | hsa_circ_0121178 | 31249  | 16017 | ENST00000305997.3 | MBOAT2 | Rybak2015<br>Jeck2013,<br>Maass2017,                  |
| chr2:9048750-9098771 | - | hsa_circ_0000972 | 50021  | 320   | NM_138799         | MBOAT2 | Memczak2013,                                          |

|                        |   |                  |       |       |                   |                  |                                                                                                 |
|------------------------|---|------------------|-------|-------|-------------------|------------------|-------------------------------------------------------------------------------------------------|
| chr2:9098625-9098771   | - | hsa_circ_0052513 | 146   | 146   | NM_138799         | MBOAT2           | Rybak2015,<br>Salzman2013                                                                       |
| chr2:9079949-9114564   | - | hsa_circ_0121176 | 34615 | 19383 | ENST00000305997.3 | MBOAT2           | Salzman2013                                                                                     |
| chr2:9008575-9098771   | - | hsa_circ_0052505 | 90196 | 912   | NM_138799         | MBOAT2           | Rybak2015<br>Rybak2015,<br>Salzman2013                                                          |
| chr2:9083315-9137472   | - | hsa_circ_0121181 | 54157 | 38925 | ENST00000305997.3 | MBOAT2           | Rybak2015                                                                                       |
| chr2:9048750-9083393   | - | hsa_circ_0052510 | 34643 | 174   | NM_138799         | MBOAT2           | Rybak2015,<br>Rybak2015,<br>Salzman2013<br>Jeck2013,<br>Maass2017,<br>Rybak2015,<br>Salzman2013 |
| chr1:95609446-95639445 | + | hsa_circ_0005720 | 29999 | 484   | NM_001199679      | TMEM56           | Salzman2013                                                                                     |
| chr1:95616880-95663161 | + | hsa_circ_0013248 | 46281 | 6225  | NM_001199679      | TMEM56           | Salzman2013                                                                                     |
| chr1:95616880-95616975 | + | hsa_circ_0013247 | 95    | 95    | NM_001199679      | TMEM56           | Salzman2013                                                                                     |
| chr1:95657105-95663161 | + | hsa_circ_0013249 | 6056  | 6056  | NM_001199679      | TMEM56           | Salzman2013                                                                                     |
| chr1:95609446-95644494 | + | hsa_circ_0114564 | 35048 | 5533  | NM_001199679      | TMEM56           | Rybak2015                                                                                       |
| chr1:95609446-95696550 | + | hsa_circ_0114565 | 87104 | 577   | ENST00000604534.1 | TMEM56           | Rybak2015<br>Maass2017,<br>Memczak2013,<br>Rybak2015,<br>Salzman2013                            |
| chr1:95609446-95616975 | + | hsa_circ_0000095 | 7529  | 410   | NM_001199691      | TMEM56-<br>RWDD3 | Salzman2013                                                                                     |

**A****DNAJC6 HNCM:HOCM**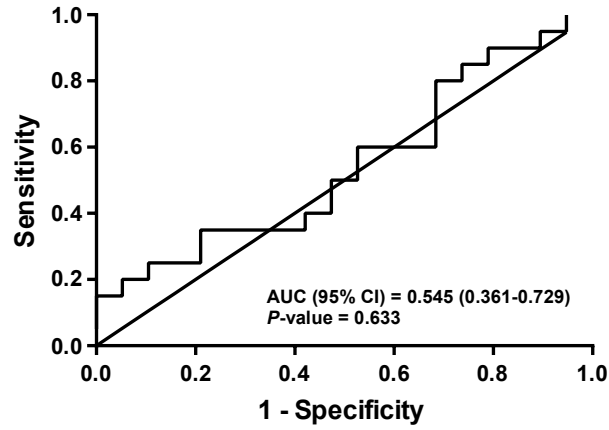**B****MBOAT2 HNCM:HOCM**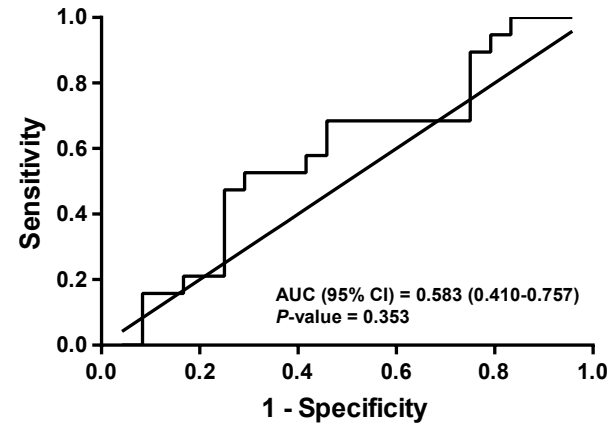**C****TMEM56 HNCM:HOCM**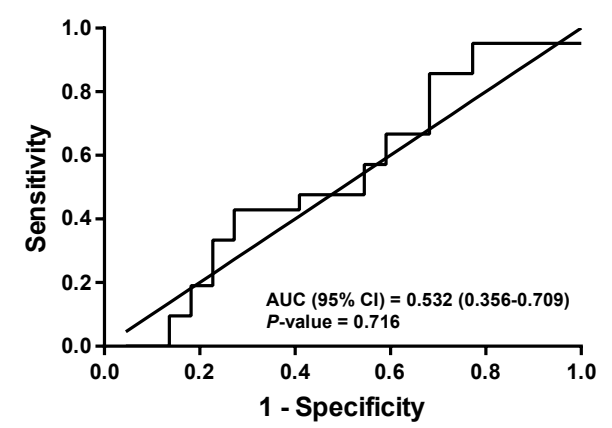

**Supplemental Figure S1.** ROC curve analyses of circulating circular RNAs (HNCM vs HOCM). **A)** circDNAJC6; **B)** circMBOAT2; **C)** circTMEM56. Data are presented as the area under the ROC curve (AUC) and 95% confidence intervals (CI). HNCM: non-obstructive hypertrophic cardiomyopathy. HOCM: obstructive hypertrophic cardiomyopathy.

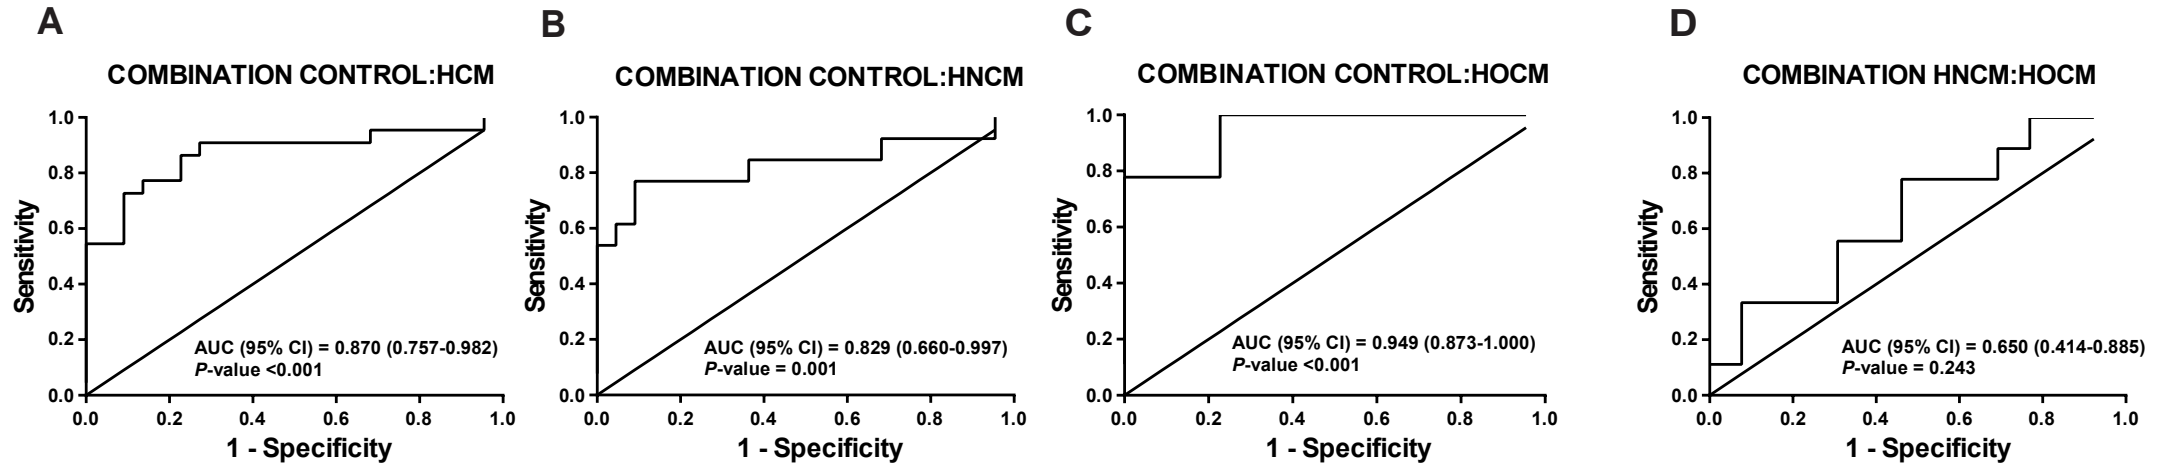

**Supplemental Figure S2.** ROC curve analyses of the combination of all circulating circular RNAs. **A)** control group vs hypertrophic cardiomyopathy (HCM) group; **B)** control group vs non-obstructive hypertrophic cardiomyopathy (HNCM) group; **C)** control group vs obstructive hypertrophic cardiomyopathy (HOCM) group; **D)** HNCM group vs HOCM group. Data are presented as the area under the ROC curve (AUC) and 95% confidence intervals (CI).
